# Supplementary material
Source: PubMed Central journal article supplement (PMC2860068)

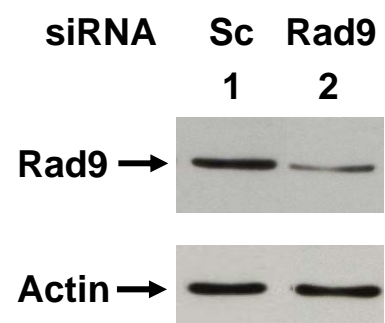

Fig. S1

Supplement: NIHMS178685-supplement-01.pdf [file NIHMS178685-supplement-01.pdf]
